# Supplementary material
Source: PubMed Central journal article supplement (PMC1073669)

*Slm1-GFP/pGAL1-SigD*

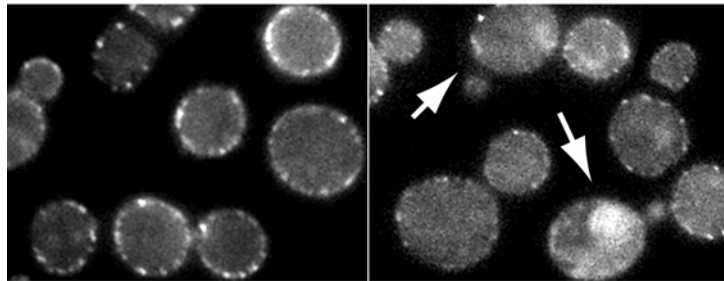

Glc

Gal

Supplement: mbc_E04-07-0564_1.pdf [file mbc_E04-07-0564_1.pdf]
